# Supplementary material for: The Influence of Renal Function Impairment on Kappa Free Light Chains in Cerebrospinal Fluid
Source: PubMed Central journal article supplement (PMC8619759; doi:10.1177/11795735211042166), 2021-11-19
Supplement: sj-pdf-2-cns-10.1177_11795735211042166.pdf [file sj-pdf-2-cns-10.1177_11795735211042166.pdf]

| Diagnosis                                                                                                                              | Physiological CSF profile (n=139) | Non-inflammatory CSF profile (n=146) | Inflammatory CSF profile (n=172) |
|----------------------------------------------------------------------------------------------------------------------------------------|-----------------------------------|--------------------------------------|----------------------------------|
| Autoimmune mediated or infectious processes in CNS, n (%)                                                                              | 0                                 | 0                                    | 154 (90%)                        |
| Serum KFLC concentration of "autoimmune mediated or infectious processes in CNS" (mg/l), mean (min-max)                                | 0                                 | 0                                    | 11.7 (2-43.2)                    |
| CSF KFLC concentration of "autoimmune mediated or infectious processes in CNS" (mg/l), mean (min-max)                                  | 0                                 | 0                                    | 5 (0.1-35.2)                     |
| Headache, diffuse paresthesia or psychiatric diagnosis, n (%)                                                                          | 39 (28%)                          | 27 (19%)                             | 3 (2%)                           |
| Serum KFLC concentration of "headache, diffuse paresthesia or psychiatric diagnosis" (mg/l), mean (min-max)                            | 12.4 (7.8-34.8)                   | 14.6 (7.3-53.2)                      | 8.9 (6.4-11.8)                   |
| CSF KFLC concentration of "headache, diffuse paresthesia or psychiatric diagnosis" (mg/l), mean (min-max)                              | 0.12 (0.04-0.4)                   | 0.22 (0.05-0.6)                      | 0.1 (0.1)                        |
| Peripheral nerve pathologies, n (%)                                                                                                    | 39 (28%)                          | 41 (28%)                             | 7 (4%)                           |
| Serum KFLC concentration of "peripheral nerve pathologies" (mg/l), mean (min-max)                                                      | 13.5 (5.6-29)                     | 19.3 (8.1-95.2)                      | 13.3 (9.4-19.7)                  |
| CSF KFLC concentration of "peripheral nerve pathologies" (mg/l), mean (min-max)                                                        | 0.14 (0.07-0.4)                   | 0.31 (0.08-1.4)                      | 0.64 (0.1-1.9)                   |
| Epilepsy, n (%)                                                                                                                        | 22 (16%)                          | 27 (19%)                             | 2 (1%)                           |
| Serum KFLC concentration of "epilepsy" (mg/l), mean (min-max)                                                                          | 20 (6.4-90.5)                     | 17 (7-50.3)                          | 5.4 (4-6.7)                      |
| CSF KFLC concentration of "epilepsy" (mg/l), mean (min-max)                                                                            | 0.2 (0.03-0.7)                    | 0.27 (0.1-1.2)                       | 0.1 (0.1)                        |
| Vascular diseases of the CNS, n (%)                                                                                                    | 17 (12%)                          | 18 (12%)                             | 6 (3%)                           |
| Serum KFLC concentration of "vascular diseases of the CNS" (mg/l), mean (min-max)                                                      | 15.6 (8.2-65.4)                   | 16.3 (7.6-45.4)                      | 19.2 (8.5-42.4)                  |
| CSF KFLC concentration of "vascular diseases of the CNS" (mg/l), mean (min-max)                                                        | 0.17 (0.1-0.4)                    | 0.27 (0.1-0.7)                       | 1.07 (0.11-3.88)                 |
| Neuro-degenerative diseases, n (%)                                                                                                     | 16 (12%)                          | 12 (8%)                              | 0                                |
| Serum KFLC concentrations of "neuro-degenerative diseases" (mg/l), mean (min-max)                                                      | 17.5 (8-31.5)                     | 22.7 (7.7-39)                        | 0                                |
| CSF KFLC concentrations of "neuro-degenerative diseases" (mg/l), mean (min-max)                                                        | 0.18 (0.08-0.45)                  | 0.32 (0.06-0.69)                     | 0                                |
| Idiopathic intracranial hypertension (IIH) or normal pressure hydrocephalus (NPH), n (%)                                               | 6 (4%)                            | 3 (2%)                               | 0                                |
| Serum KFLC concentration of "idiopathic intracranial hypertension (IIH) or normal pressure hydrocephalus (NPH)" (mg/l), mean (min-max) | 18.1 (9.5-26.9)                   | 15.5 (11.7-18.8)                     | 0                                |
| CSF KFLC concentration of "idiopathic intracranial hypertension (IIH) or normal pressure hydrocephalus (NPH)" (mg/l), mean (min-max)   | 0.12 (0.09-0.14)                  | 0.18 (0.09-0.31)                     | 0                                |
| Encephalopathy, n (%)                                                                                                                  | 0                                 | 15 (10%)                             | 0                                |
| Serum KFLC concentration of "encephalopathy" (mg/l), mean (minx-max)                                                                   | 0                                 | 14.6 (7.1-32.5)                      | 0                                |
| CSF KFLC concentration of "encephalopathy" (mg/l), mean (minx-max)                                                                     | 0                                 | 0.24 (0.03-0.55)                     | 0                                |
| Malignant diseases of the CNS, n (%)                                                                                                   | 0                                 | 3 (2%)                               | 0                                |
| Serum KFLC concentration of "malignant diseases of the CNS" (mg/l), mean (min-max)                                                     | 0                                 | 54.1 (12.4-130)                      | 0                                |
| CSF KFLC concentration of "malignant diseases of the CNS" (mg/l), mean (min-max)                                                       | 0                                 | 0.9 (0.4-1.9)                        | 0                                |

Supplemental table 1
